# Supplementary material for: Association between Hemoglobin Glycation Index and In-Hospital all-cause mortality of patients with Congestive Heart Failure: a retrospective study utilizing the MIMIC-IV database
Source: Frontiers journal article supplement (doi:10.3389/fendo.2025.1475063), 2025-03-19
Supplement: Image_1.pdf [file Image_1.pdf]

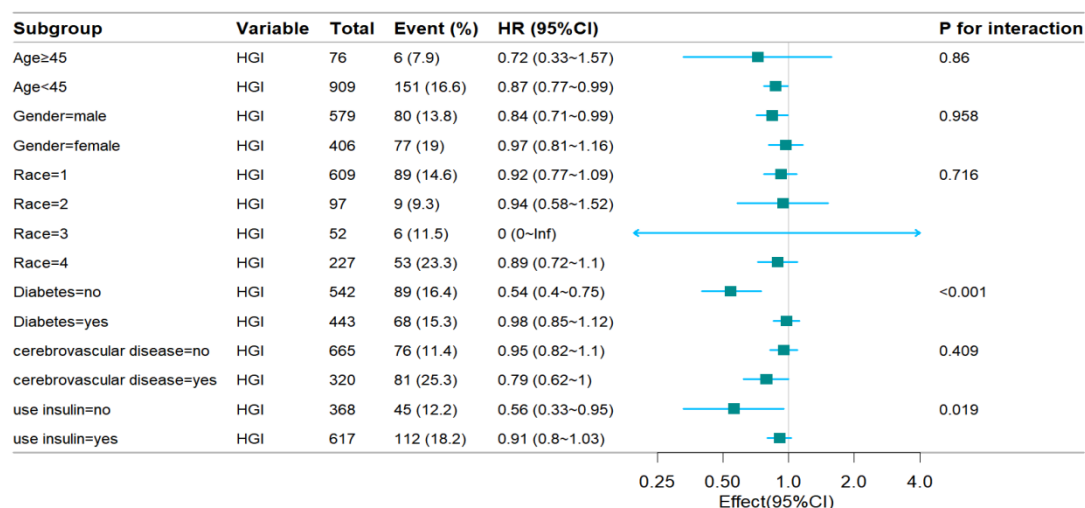

Supplementary Fig.1a Forest plot of subgroup analysis 30 days mortality analysis with HGI classification in CHF patients. HGI: haemoglobin glycation index; CHF: congestive heart failure CI: confidence interval; HR: hazard ratio.

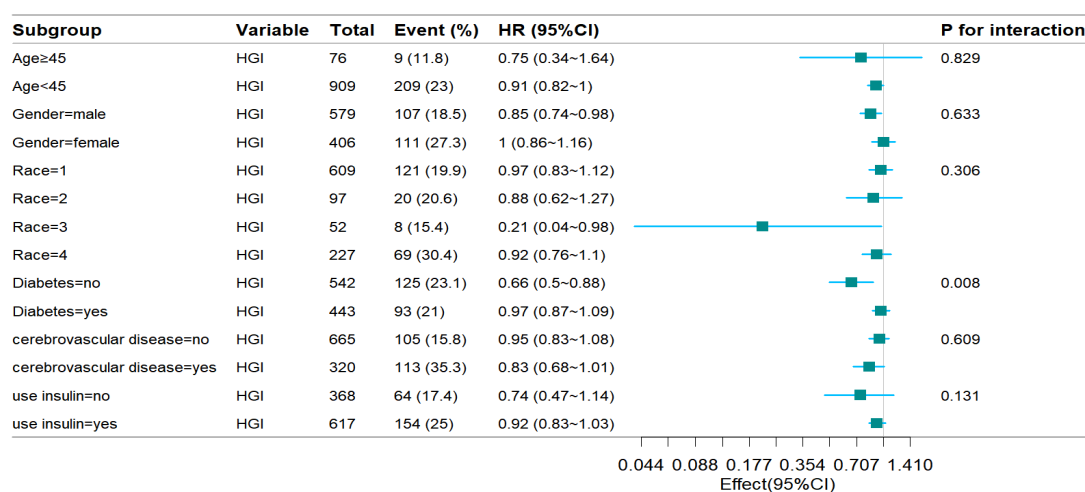

Supplementary Fig.1b Forest plot of subgroup analysis 90 days mortality analysis with HGI classification in CHF patients. HGI: haemoglobin glycation index; CHF: congestive heart failure CI: confidence interval; HR: hazard ratio.

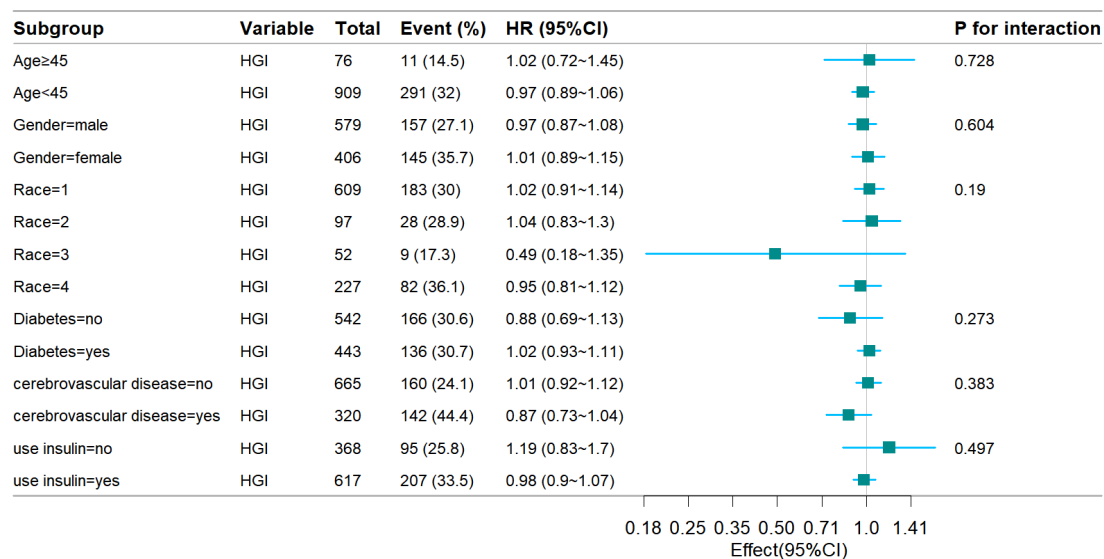

Supplementary Fig.1c Forest plot of subgroup analysis 365 days mortality analysis with HGI classification in CHF patients. HGI: haemoglobin glycation index; CHF: congestive heart failure CI: confidence interval; HR: hazard ratio.

## Figure Legends

Supplementary Figure.1 a Forest plot of subgroup analysis 30 days mortality analysis with HGI classification in CHF patients. b Forest plot of subgroup analysis 90 days mortality analysis with HGI classification in CHF patients. c. Forest plot of subgroup analysis 365 days mortality analysis with HGI classification in CHF patients.
